# Supplementary material for: A T1 MRI detectable hyaluronic acid hydrogel for in vivo tracking after intracerebral injection in stroke
Source: Royal Society of Chemistry journal article supplement (doi:10.1039/d4tb02722a), 2025-01-01
Supplement: d4tb02722a1.pdf [file d4tb02722a1.pdf]

## Supporting Information

### **A T1 MRI detectable hyaluronic acid hydrogel for in vivo tracking after intracerebral injection in stroke**

*Moustoifa Said,<sup>†ab</sup> Jing Jing,<sup>†b</sup> Olivier Montigon,<sup>c</sup> Nora Collomb,<sup>a</sup> Frédérique Vossier,<sup>a</sup> Benoît Chovelon,<sup>de</sup> Bayan El Amine,<sup>a</sup> Isabelle Jeacomine,<sup>b</sup> Benjamin Lemasson,<sup>a</sup> Emmanuel Luc Barbier,<sup>ac</sup> Olivier Detante,<sup>ad</sup> Claire Rome,<sup>a</sup> Rachel Auzély-Velty<sup>b\*</sup>*

### **Table of Contents**

1. <sup>1</sup>H NMR spectra of HA-PBA, HA-Fru-ADH and HA-Fru-GdDOTA derivatives, and 2D HSQC NMR spectrum of HA-Fru
2. Synthesis of GdDOTAGA-CHO
3. Representative images of Iba-1stained rat brain sections.

1.  $^1\text{H}$  NMR spectra of  $^1\text{H}$  NMR spectra of HA-PBA and HA-Fru-ADH derivatives, and 2D HSQC NMR spectrum of HA-Fru

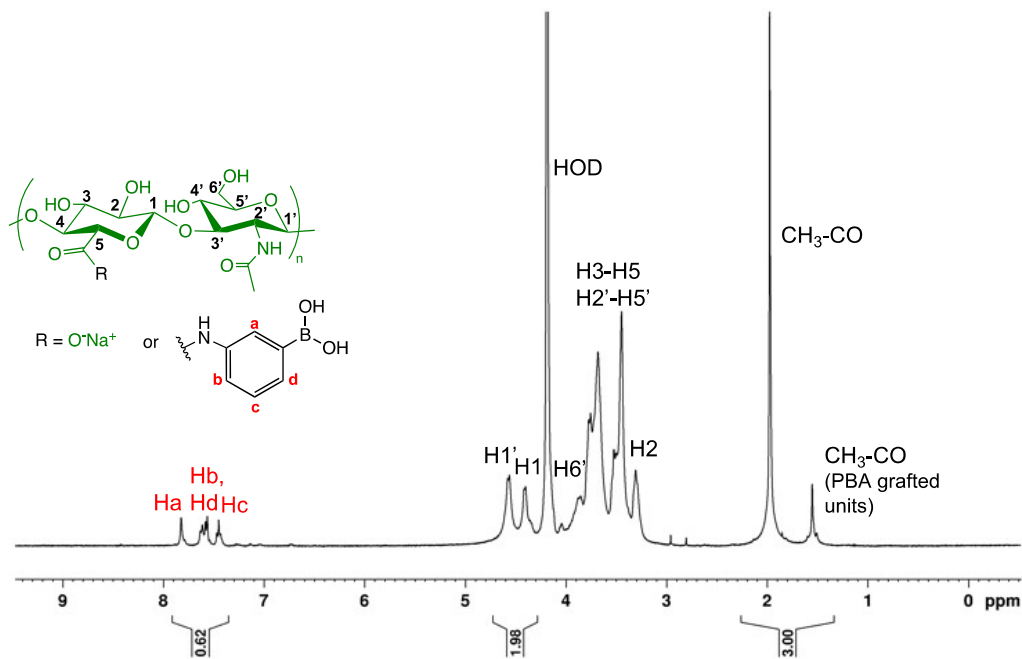

Figure S1.  $^1\text{H}$  NMR spectrum (400 MHz,  $\text{D}_2\text{O}$ , 6 mg/mL, 80 °C) of HA-PBA.

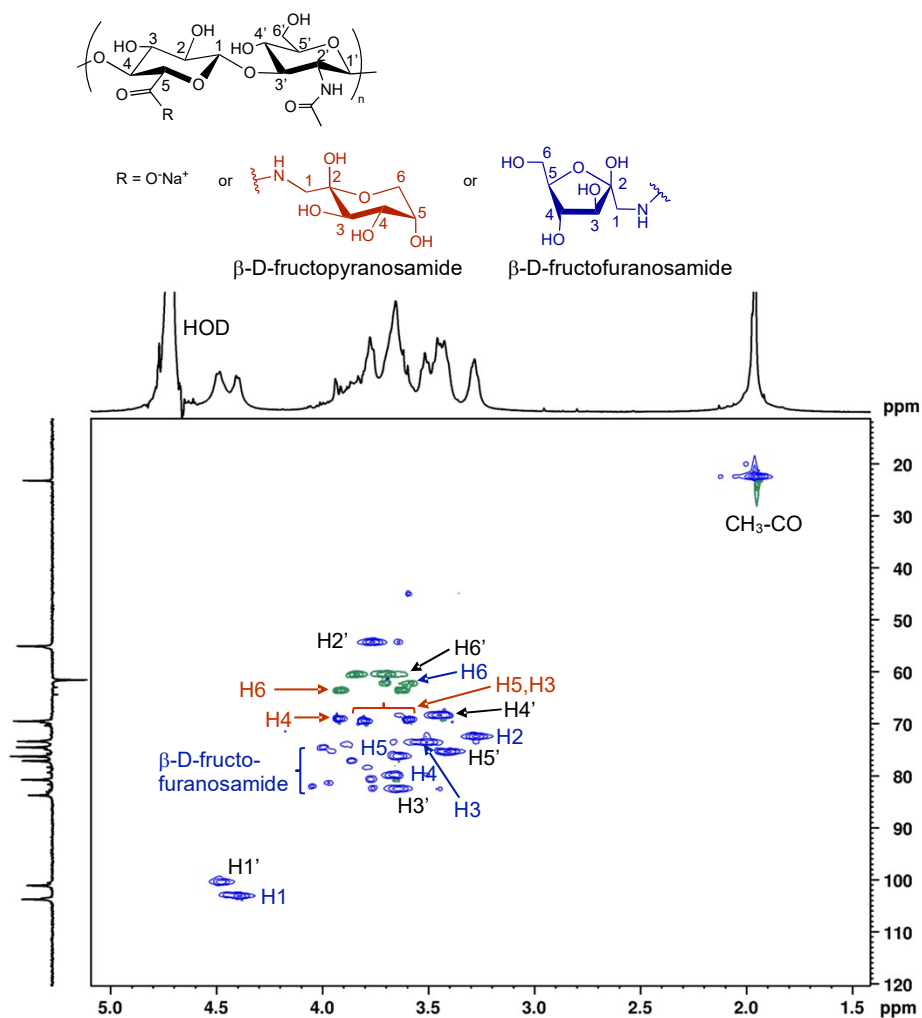

**Figure S2.** DEPT-ed-HSQC spectrum (500 MHz, D<sub>2</sub>O, 11 mg.mL<sup>-1</sup>, 80 °C) of HA-fructose. Of note, β-D-fructopyranose is the major tautomeric form observed for grafted fructose moieties, followed by the β-D-fructofuranose form.

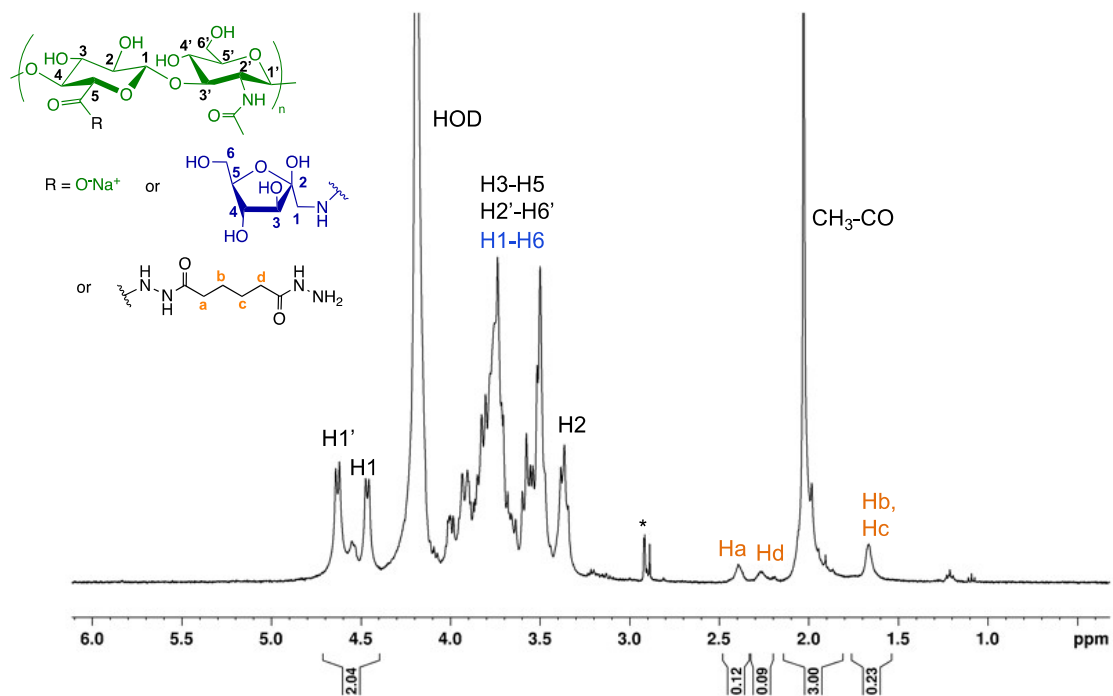

**Figure S3.** <sup>1</sup>H NMR spectrum (400 MHz, D<sub>2</sub>O, 6 mg/mL, 80 °C) of HA-Fru-ADH.

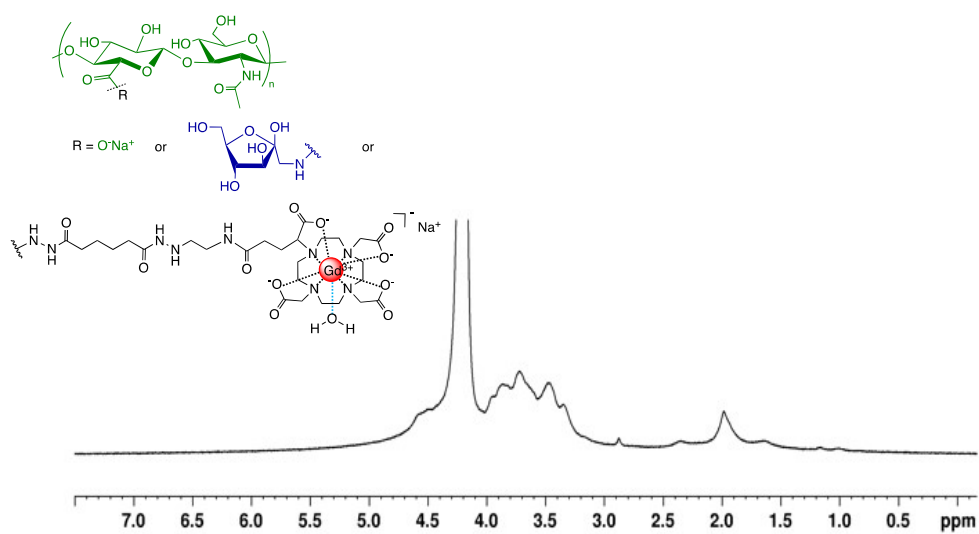

**Figure S4.** <sup>1</sup>H NMR spectrum (400 MHz, D<sub>2</sub>O, 6 mg/mL, 80 °C) of HA-Fru-GdDOTA.

## 2. Synthesis of GdDOTAGA-CHO

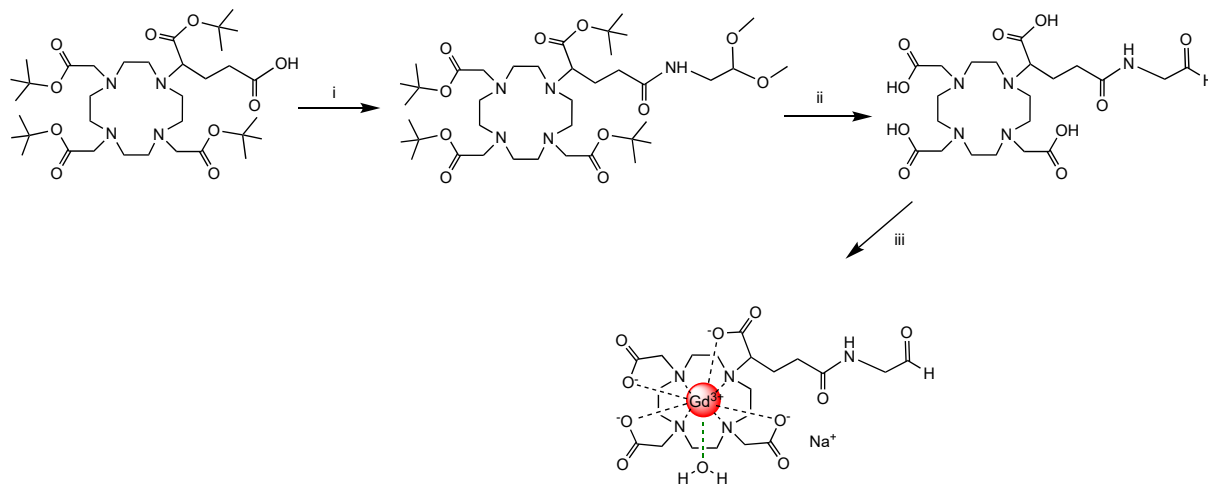

**Scheme S1.** Synthesis of DOTAGA-CHO: i: HATU, DIEA, dimethoxyethylamine, CH<sub>2</sub>Cl<sub>2</sub>/DMF, RT; ii: TFA/CH<sub>2</sub>Cl<sub>2</sub> 3:1, v/v, RT; iii: GdCl<sub>3</sub>·6H<sub>2</sub>O, water (pH 5), 40 °C.

A.

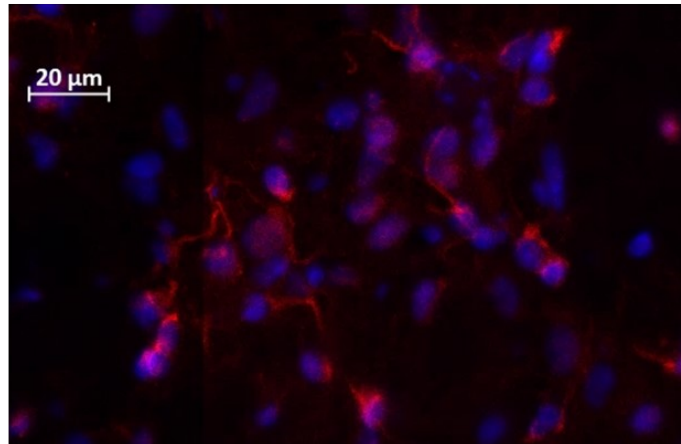

B.

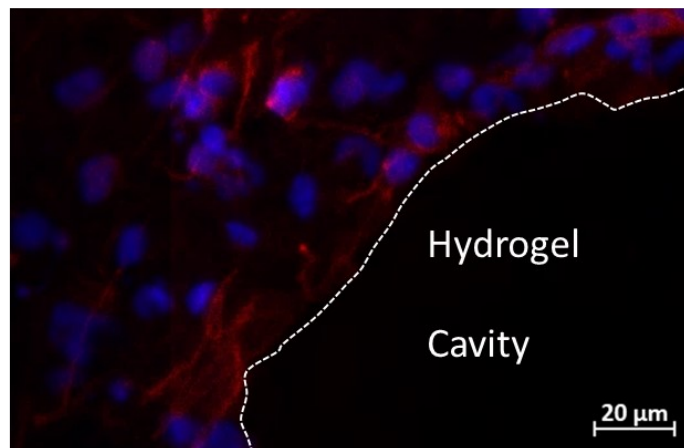

C.

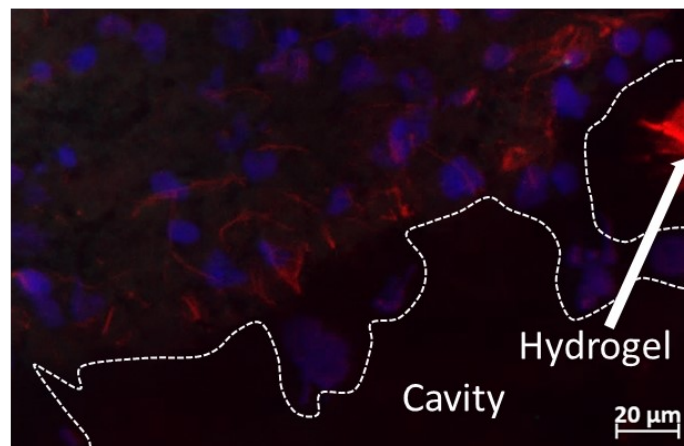

**Figure S5.** Representative images of Iba-1stained rat brain sections. A) Iba1+ cell morphology in rat brain tissue. B) Iba1+ cell morphology in rat brain tissue at the edge of the cavity produced by injection of the control hydrogel (HA-ref hydrogel). C) Iba1+ cell morphology in rat brain tissue at the edge of the cavity produced by injection of the Gadolinium hydrogel (HA-GdDOTA hydrogel). Blue, DAPI; Red, Iba1
